# Supplementary material
Source: PubMed Central journal article supplement (PMC4633902)
Supplement: ajcr0005-2730-f6.pdf [file ajcr0005-2730-f6.pdf]

## MiR-449a regulates invasion via MAP2K1

**Supplementary Table 1.** Sequences of has-miR-449a mimic/inhibitor

| Name              | Sequences                             |
|-------------------|---------------------------------------|
| Inhibitor         | 5'-ACCAGCUAACAAUACACUGCCA-3'          |
| Inhibitor control | 5'-CAGUACUUUUGUGUAGUACAA-3'           |
| Mimics            | Sense 5'-UGGCAGUGUAUUGUUAGCUGGU-3'    |
|                   | Antisense 5'-CAGCUAACAAUACACUGCCA-3'  |
| Mimics control    | Sense 5'-UUCUCCGAACGUGUCACGUTT-3'     |
|                   | Antisense 5'-ACGUGACACGUUCGGAGAATT-3' |
